# Supplementary material
Source: Springer Nature journal article supplement (https://www.springermedizin.de/resource/supplementary/12876_2013_1117_MOESM2_ESM.pdf/9438518)
Supplement: MOESM2 [file 9438518]

**Table 1: Sample characteristics**

| Characteristic                          | N    | (%)     |
|-----------------------------------------|------|---------|
| All subjects, N                         | 1000 | (100%)  |
| Age, median (IQR)                       | 38   | (24)    |
| Female, n(%)                            | 760  | (76%)   |
| Ethnicity, n(%)                         |      |         |
| Chinese                                 | 200  | (20.0%) |
| Indian                                  | 174  | (17.4%) |
| Malay                                   | 595  | (59.5%) |
| Other                                   | 31   | (3.1%)  |
| Faecal Incontinence                     | 83   | (8.3%)  |
| Chronic disease, n(%)                   | 238  | (23.8%) |
| Diabetes mellitus                       | 108  | (10.8%) |
| Hypertension                            | 177  | (17.7%) |
| Hypercholesterolemia                    | 74   | (7.4%)  |
| Ischaemic heart disease                 | 24   | (2.4%)  |
| Previous operation, n(%)                | 285  | (28.5%) |
| Pelvic, perineal or anorectal operation | 15   | (1.5%)  |
| Other operation                         | 270  | (27%)   |
| Defaecation frequency, n(%)             |      |         |
| 1 – 7 times a week                      | 657  | (65.7%) |
| 8 – 15 times a week                     | 244  | (24.4%) |
| 16 – 21 times a week                    | 73   | (7.3%)  |
| More than 22 times a week               | 26   | (2.6%)  |
| Defaecation duration, n(%)              |      |         |
| 1 – 5 minutes                           | 547  | (54.7%) |
| 6 – 10 minutes                          | 291  | (29.1%) |
| 11 – 15 minutes                         | 89   | (8.9%)  |
| More than 15 minutes                    | 73   | (7.3%)  |

Note: ^Total is 999 as one subject had missing data. \*FI severity measured by Wexner Continence Scale (WCS) score.
